# Supplementary material
Source: Springer Nature journal article supplement (https://www.springermedizin.de/resource/supplementary/13098_2014_386_MOESM2_ESM.docx/9670960)
Supplement: MOESM2 [file 9670960]

Figure 3.
